# Supplementary material for: Ultrathin nanosheets of feroxyhyte: a new two-dimensional material with robust ferromagnetic behavior
Source: Royal Society of Chemistry journal article supplement (doi:10.1039/c3sc53303d), 2014-01-01
Supplement: c3sc53303d1.pdf [file c3sc53303d1.pdf]

Electronic Supplementary Information for

**Ultrathin Nanosheets of Feroxyhyte: A New Two-dimensional  
Material with Robust Ferromagnetic Behavior**

Pengzuo Chen,<sup>†a</sup> Kun Xu,<sup>†a</sup> Xiuling Li,<sup>b</sup> Yuqiao Guo,<sup>a</sup> Dan Zhou,<sup>a</sup>  
Jiyin Zhao,<sup>a</sup> Xiaojun Wu,<sup>a,b</sup> Changzheng Wu<sup>\*a</sup> and Yi Xie<sup>a</sup>

<sup>a</sup> Hefei National Laboratory for Physical Sciences at Microscale,  
University of Science and Technology of China, Hefei, 230026,  
P. R. China. E-mail: czwu@ustc.edu.cn

<sup>b</sup> CAS Key Laboratory of Materials for Energy Conversion and Depart of  
Material Science and Engineering, University of Science and Technology  
of China, Hefei, 230026, P. R. China

<sup>†</sup>These authors contributed equally to this work

## **Table of contents**

|                                                                                                                                                      |           |
|------------------------------------------------------------------------------------------------------------------------------------------------------|-----------|
| <b>S1. SEM, TEM and AFM images of the synthetic Fe(OH)<sub>2</sub> nanosheets.....</b>                                                               | <b>3</b>  |
| <b>S2. The IR image of the <math>\delta</math>-FeOOH ultrathin nanosheets .....</b>                                                                  | <b>4</b>  |
| <b>S3. XPS survey spectrum .....</b>                                                                                                                 | <b>5</b>  |
| <b>S4. SEM and TEM images of the synthetic <math>\delta</math>-FeOOH nanosheets .....</b>                                                            | <b>6</b>  |
| <b>S5. The comparision of different TEM images of the <math>\delta</math>-FeOOH nanosheets<br/>obtained in the mixture with and without EG .....</b> | <b>7</b>  |
| <b>S6. Elemental Mapping of the as-synthetic <math>\delta</math>-FeOOH ultrathin nanosheets. ....</b>                                                | <b>8</b>  |
| <b>S7. Characterization of <math>\delta</math>-FeOOH nanosheets thin film .....</b>                                                                  | <b>9</b>  |
| <b>S8. The UV-Vis spectrum of the <math>\delta</math>-FeOOH ultrathin nanosheets .....</b>                                                           | <b>10</b> |
| <b>Table S1. Comparison of saturation magnetization of the reported<br/>ferromagnetic nanosheets .....</b>                                           | <b>11</b> |

## S1. SEM, TEM and AFM images of the synthetic $\text{Fe}(\text{OH})_2$ nanosheets

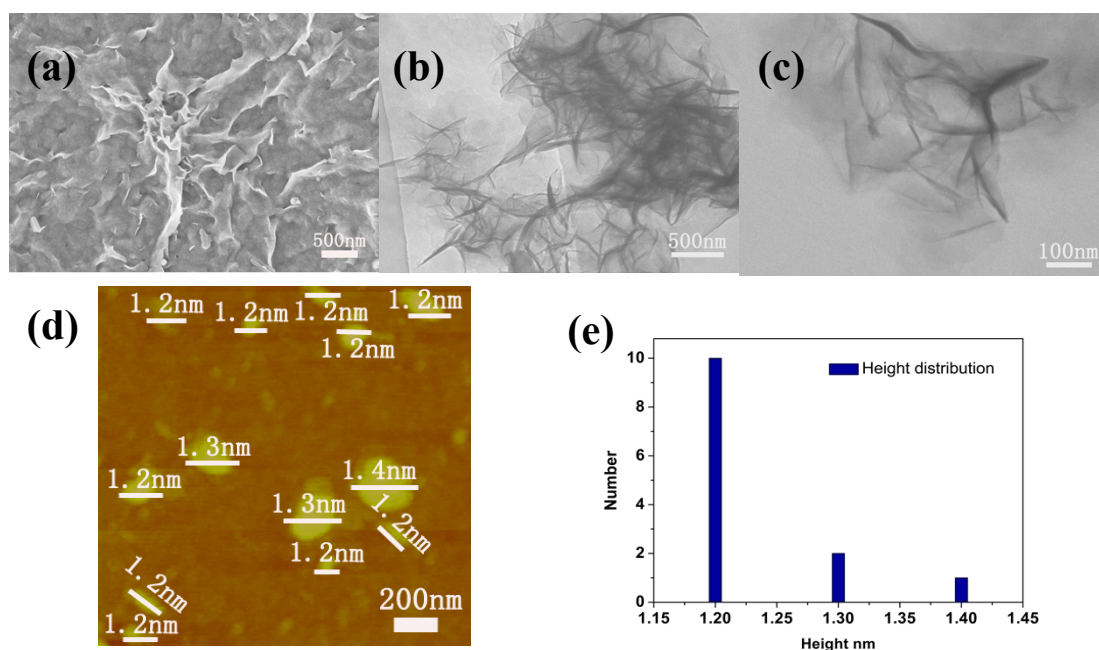

**Figure S1.** (a) SEM image of the  $\text{Fe}(\text{OH})_2$  precursor. (b) and (c) TEM images of the  $\text{Fe}(\text{OH})_2$  precursor. (d) AFM image of  $\text{Fe}(\text{OH})_2$  precursor. (e) the corresponding height distribution.

## S2. The IR image of the $\delta$ -FeOOH ultrathin nanosheets

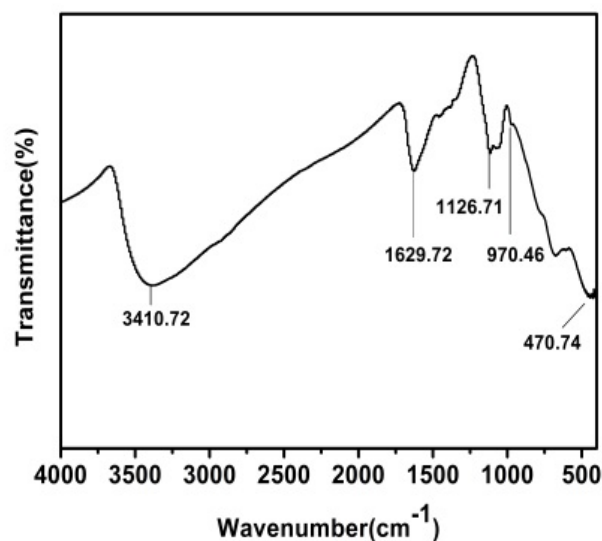

**Figure S2.** The IR image of the synthetic  $\delta$ -FeOOH ultrathin nanosheets.

The IR spectrum is shown in Figure S2, the peaks at 470.74 cm<sup>-1</sup> could be ascribed to Fe-O stretching vibration of the  $\delta$ -FeOOH, while the Fe-O-H bending mode is recorded at 1126.71cm<sup>-1</sup> and a bridge between two iron ions through the OH group exhibits the bridging OH bending mode at 970.46cm<sup>-1</sup>. The band at 3415.20cm<sup>-1</sup> was attributed to stretching vibrations of surface H<sub>2</sub>O molecules that were adsorbed on the synthetic  $\delta$ -FeOOH ultrathin nanosheets and 1629.72cm<sup>-1</sup> was ascribed to H<sub>2</sub>O-bending vibration.<sup>1</sup>

### S3. XPS survey spectrum

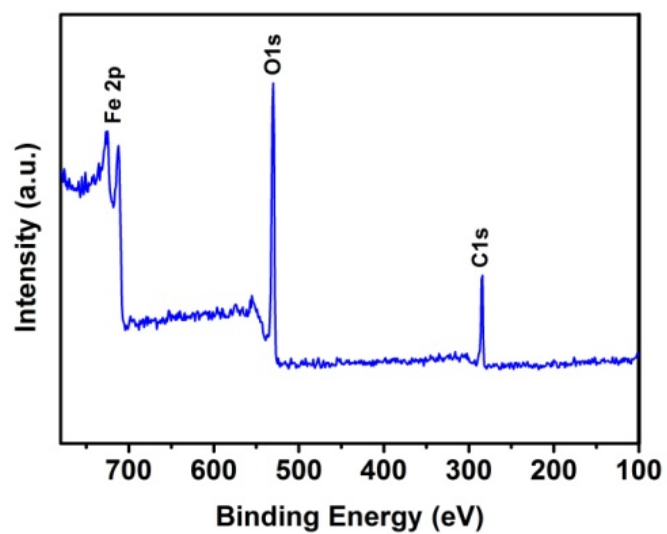

**Figure S3.** XPS survey spectrum of the  $\delta$ -FeOOH ultrathin nanosheets.

#### S4. SEM and TEM images of the synthetic $\delta$ -FeOOH nanosheets

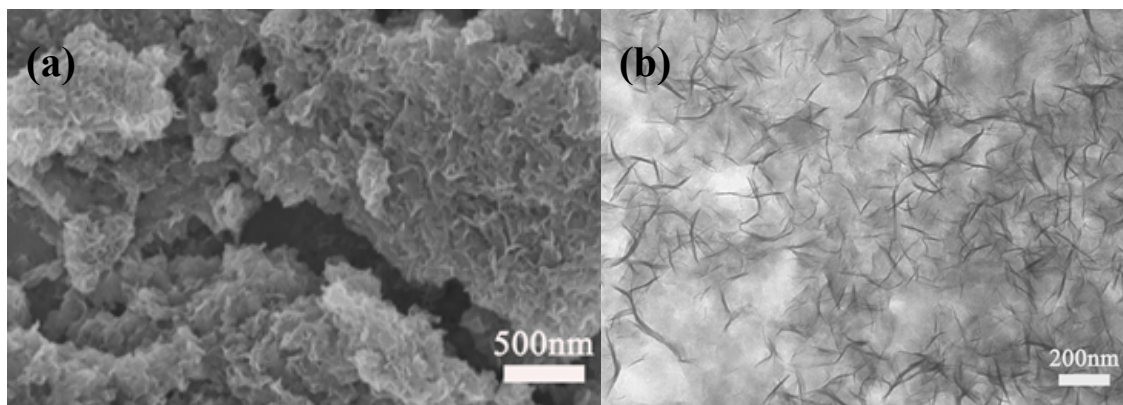

**Figure S4.** (a) SEM image and (b) TEM image of the as-synthetic ultrathin  $\delta$ -FeOOH nanosheets.

#### S5. The comparison of different TEM images of the $\delta$ -FeOOH nanosheets obtained in the mixture with and without EG

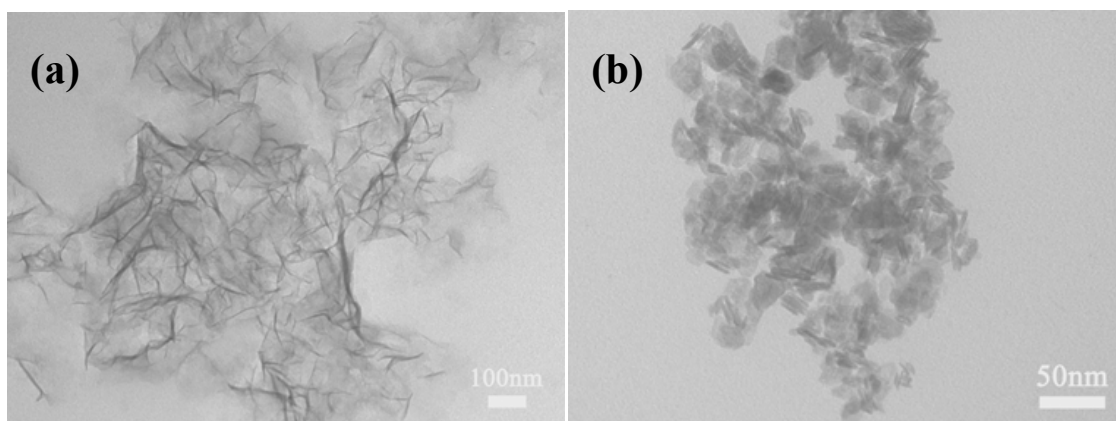

**Figure S5.** (a) TEM image of the ultrathin  $\delta$ -FeOOH nanosheets prepared in EG-H<sub>2</sub>O mixture and (b) TEM image of the  $\delta$ -FeOOH nanoparticles obtained from the pure H<sub>2</sub>O solution.

**S6. Elemental Mapping of the as-synthetic  $\delta$ -FeOOH ultrathin nanosheets.**

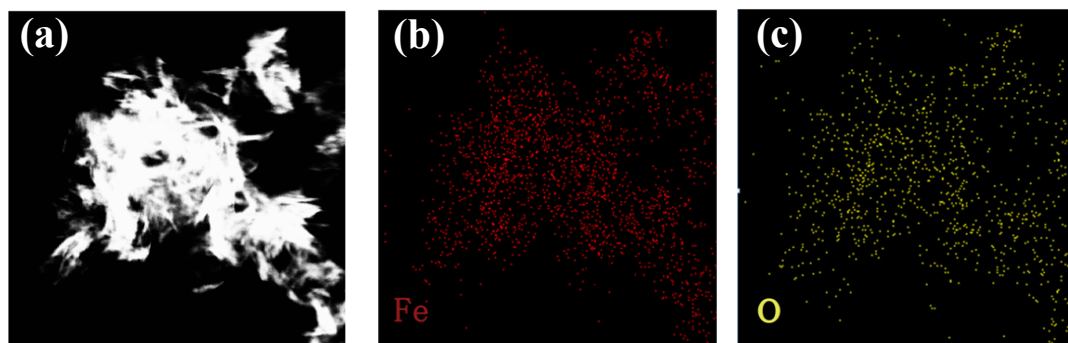

**Figure S6.** (a) HAADF-STEM image for typical  $\delta$ -FeOOH ultrathin nanosheets. (b, c) elemental mapping of Fe, O.

## S7. Characterization of $\delta$ -FeOOH nanosheets thin film

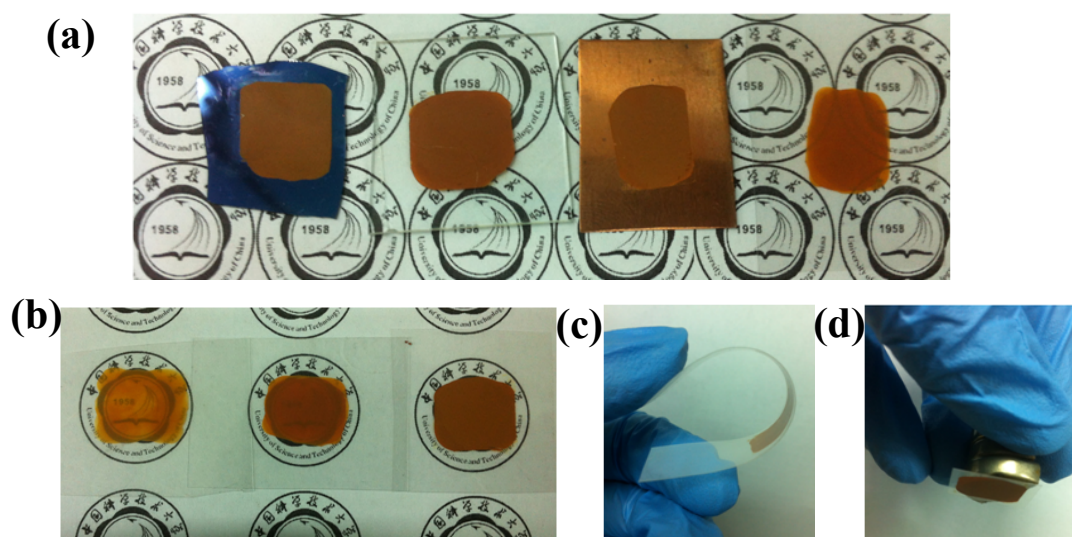

**Figure S7.** (a) The as-prepared  $\delta$ -FeOOH thin film could be readily transferred to various substrates (silicon, quartz, copper, and PET respectively). (b) The photograph of  $\delta$ -FeOOH thin film with different thickness transferred onto flexible PET substrates and (c) bend crooked  $\delta$ -FeOOH film/PET, indicating the flexibility. (d) The photograph of  $\delta$ -FeOOH thin film/PET absorbed by a magnet in vertical direction, demonstrating its robust room-temperature ferromagnetism.



## S8. The UV-Vis spectrum of the $\delta$ -FeOOH ultrathin nanosheets

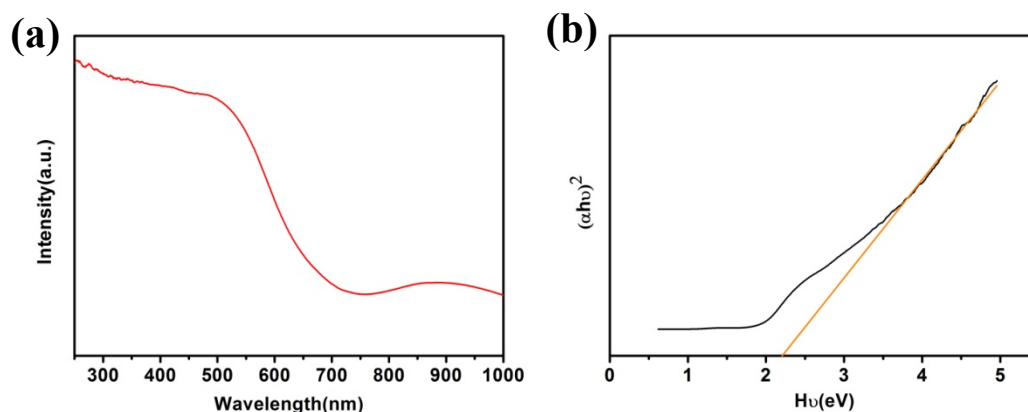

**Figure S8.** (a) UV-Vis absorption spectrum of the synthetic  $\delta$ -FeOOH ultrathin nanosheets. (b) The plots of  $(\alpha h\nu)^2$  versus  $h\nu$ , which was calculated from the UV-Vis diffuse reflectance spectrum.

The UV-Vis absorption spectrum of the synthetic  $\delta$ -FeOOH ultrathin nanosheets was shown in Figure S8a. The broad absorption in the range of 250nm ~600nm of the figure S8a indicates a strong absorption in both the Vis-light and UV region for the as-synthetic  $\delta$ -FeOOH ultrathin nanosheets. The optical absorption near the band was calculated from the Figure S8a by using the following equation :  $\alpha h\nu = A(h\nu - E_g)^{n/2}$ . Where A is a constant,  $\alpha$  is absorption coefficient,  $\nu$  is light frequency,  $E_g$  is band gap, n depends on the kinds of direct-gap ( $n=1$ ) and indirect gap ( $n=4$ ) semiconductor in a material. Therefore, based on the detailed calculation of the UV-Vis experimental data, the synthetic  $\delta$ -FeOOH ultrathin nanosheet is a direct-gap semiconductor with a band gap of 2.2eV.<sup>2</sup>

**Table S1. Comparison of saturation magnetization of the reported ferromagnetic nanosheets**

| <b>Materials selection</b>         | <b>Measure temperature</b>          | <b>Saturation magnetization</b>                                 | <b>Ref#</b>  |
|------------------------------------|-------------------------------------|-----------------------------------------------------------------|--------------|
| Mn-Bi <sub>2</sub> Te <sub>3</sub> | 5K                                  | 0.074 <b>emu/g</b>                                              | 3            |
| Graphene                           | 1.8K <sup>a</sup> 300K <sup>b</sup> | 0.007 <b>emu/g</b> <sup>a</sup> 0.013 <b>emu/g</b> <sup>b</sup> | 4,5          |
| Graphene oxide                     | 2K                                  | 0.11 <b>emu/g</b>                                               | 6            |
| N- Graphene oxide                  | 2K                                  | 1.66 <b>emu/g</b>                                               | 6            |
| H-Graphene                         | 300K                                | 0.006 <b>emu/g</b>                                              | 7            |
| SnO <sub>2</sub>                   | 300K                                | 0.0244 <b>emu/g</b>                                             | 8            |
| MoS <sub>2</sub>                   | 300K                                | 2 <b>emu/g</b>                                                  | 9            |
| VS <sub>2</sub>                    | 300K                                | 0.09 <b>emu/g</b>                                               | 10           |
| VSe <sub>2</sub>                   | 300K                                | 0.008 <b>emu/g</b>                                              | 11           |
| Co <sub>9</sub> Se <sub>8</sub>    | 300K                                | 1.7 <b>emu/g</b>                                                | 12           |
| $\delta$ -FeOOH                    | 300K                                | 7.5 <b>emu/g</b>                                                | Present work |

## Reference

- [1] H. Liu, H. Guo, P. Li and Y. Wei, *J. Phys. Chem. Solids*, 2009, **70**, 186-191.
- [2] M. C. Pereira, E. M. Garcia, A. Candido da Silva, E. Lorencon, J. D. Ardisson, E. Murad, J. D. Fabris, T. Matencio, T. de Castro Ramalho and M. V. J. Rocha, *J. Mater. Chem.*, 2011, **21**, 10280-10282.
- [3] L. Cheng, Z.-G. Chen, S. Ma, Z.-d. Zhang, Y. Wang, H.-Y. Xu, L. Yang, G. Han, K. Jack, G. Lu and J. Zou, *J. Am. Chem. Soc.*, 2012, **134**, 18920-18923.
- [4] R. R. Nair, I. L. Tsai, M. Sepioni, O. Lehtinen, J. Keinonen, A. V. Krasheninnikov, A. H. Castro Neto, M. I. Katsnelson, A. K. Geim and I. V. Grigorieva, *Nat. Commun.*, 2013, **4**, 2010.
- [5] L. Chen, L. Guo, Z. Li, H. Zhang, J. Lin, J. Huang, S. Jin and X. Chen, *Sci. Rep.*, 2013, **3**, 2599.
- [6] Y. Liu, N. Tang, X. Wan, Q. Feng, M. Li, Q. Xu, F. Liu and Y. Du, *Sci. Rep.*, 2013, **3**, 2566.
- [7] A. Y. S. Eng, H. L. Poh, F. Šaněk, M. Maryško, S. Matějková, Z. Sofer and M. Pumera, *ACS Nano*, 2013, **7**, 5930-5939
- [8] C. Wang, Q. Wu, H. Ge, T. Shang, J. Jiang, *Nanotechnology*, 2012, **23**, 075704.
- [9] J. Zhang, J. M. Soon, K. P. Loh, J. Yin, J. Ding, M. B. Sullivan and P. Wu, *Nano Lett.*, 2007, **7**, 2370-2376.

- [10] D. Gao, Q. Xue, X. Mao, W. Wang, Q. Xu and D. Xue, *J. Mater. Chem. C*, 2013, **1**, 5909-5916.
- [11] K. Xu, P. Chen, X. Li, C. Wu, Y. Guo, J. Zhao, X. Wu and Y. Xie, *Angew. Chem., Int. Ed.*, 2013, **52**, 10477-10481.
- [12] X. Zhang, J. Zhang, J. Zhao, B. Pan, M. Kong, J. Chen and Y. Xie, *J. Am. Chem. Soc.*, 2012, **134**, 11908-11911.
